# Supplementary material for: A narrow band blue phosphor NaBa4Al2B8O18Cl3:Eu2+ for white light emitting diodes
Source: Royal Society of Chemistry journal article supplement (doi:10.1039/d4dt02858a), 2025-01-01
Supplement: d4dt02858a2.pdf [file d4dt02858a2.pdf]

### Supporting Information

#### A narrow band blue phosphor $\text{NaBa}_4\text{Al}_2\text{B}_8\text{O}_{18}\text{Cl}_3:\text{Eu}^{2+}$ for white light emitting diodes

Boyu Pan <sup>1a</sup>, Yao Wang <sup>1a\*</sup>, Bing Xu <sup>a</sup>, Kangkang Wang <sup>a</sup>, Liang Zhang <sup>a</sup>, Zhixian He <sup>b</sup>, Shengnan Zhang <sup>c</sup>

*a. School of Chemistry and Chemical Engineering, Xi'an University of Architecture and Technology, Xi'an 710055, China.*

*b. Instrumental Analysis Center, Xi'an University of Architecture and Technology, Xi'an 710055, China.*

*c. Northwest Institute for Nonferrous Metal Research, Xi'an 710016, China.*

\* Corresponding author at: *School of Chemistry and Chemical Engineering, Xi'an University of Architecture and Technology, Xi'an 710055, China. Tel.: +86 29 82203378; Fax: +86 29 82202330;*

1 Equal contributions

*E-mail address: [wyspacestar@aliyun.com](mailto:wyspacestar@aliyun.com)*

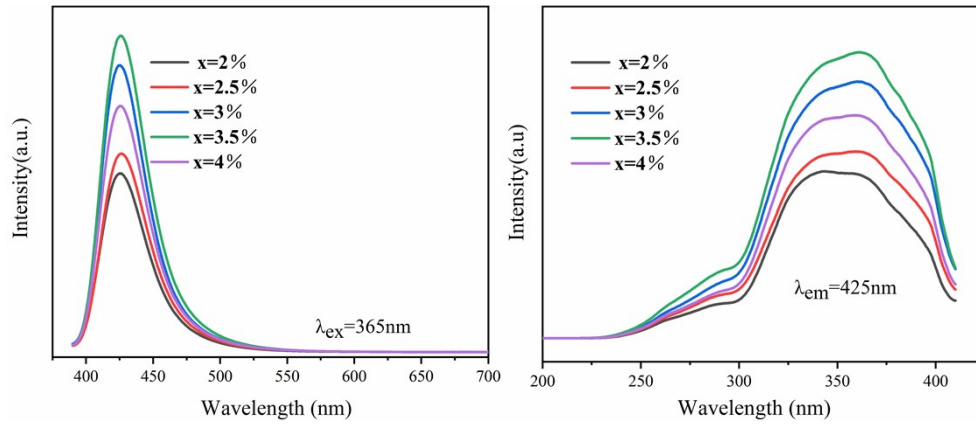

Fig. S1 Excitation and emission spectra of NABC with different Eu<sup>2+</sup> doping concentrations

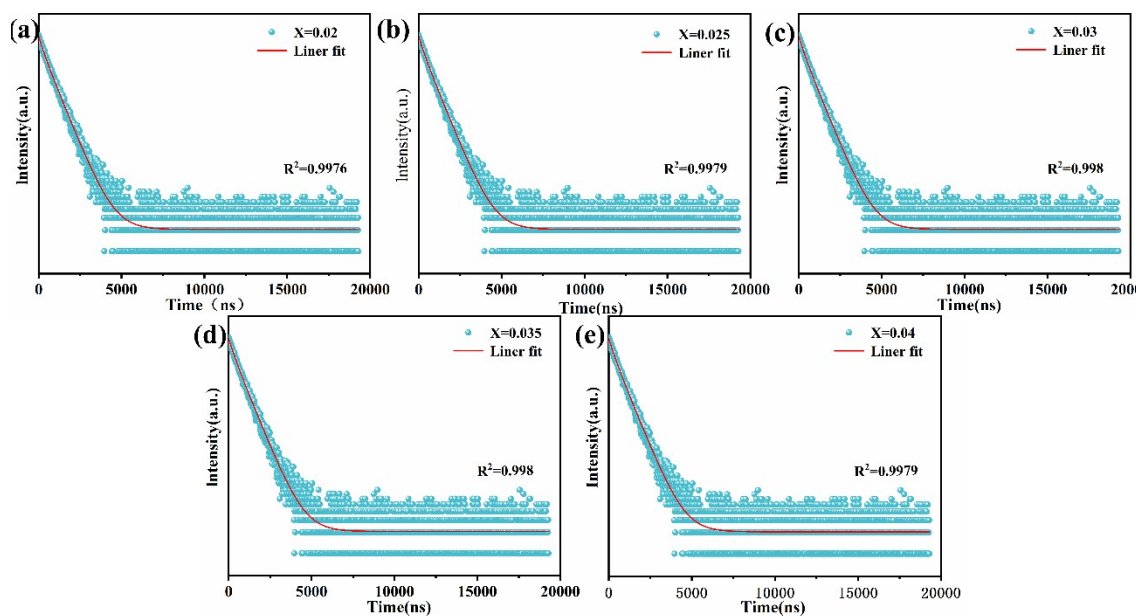

Fig. S2 Fluorescence decay curves and fitted residuals of bi-exponential functions of NBAC: $x\text{Eu}^{2+}$  were monitored at 425 nm using an excitation wavelength of 365 nm at room temperature

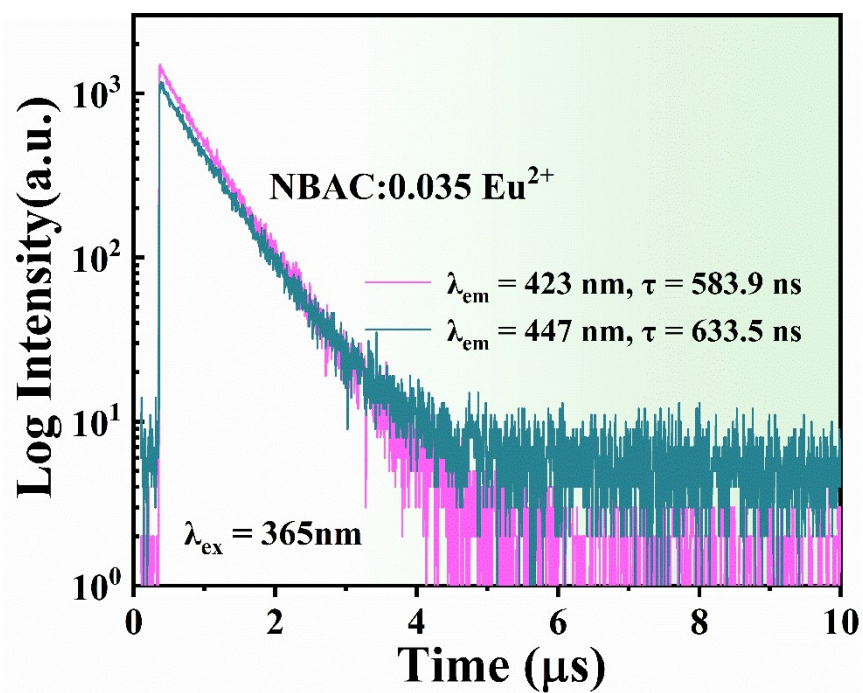

Fig. S3 Comparison of different emission decay curves for emissions at 423 and 547 nm.

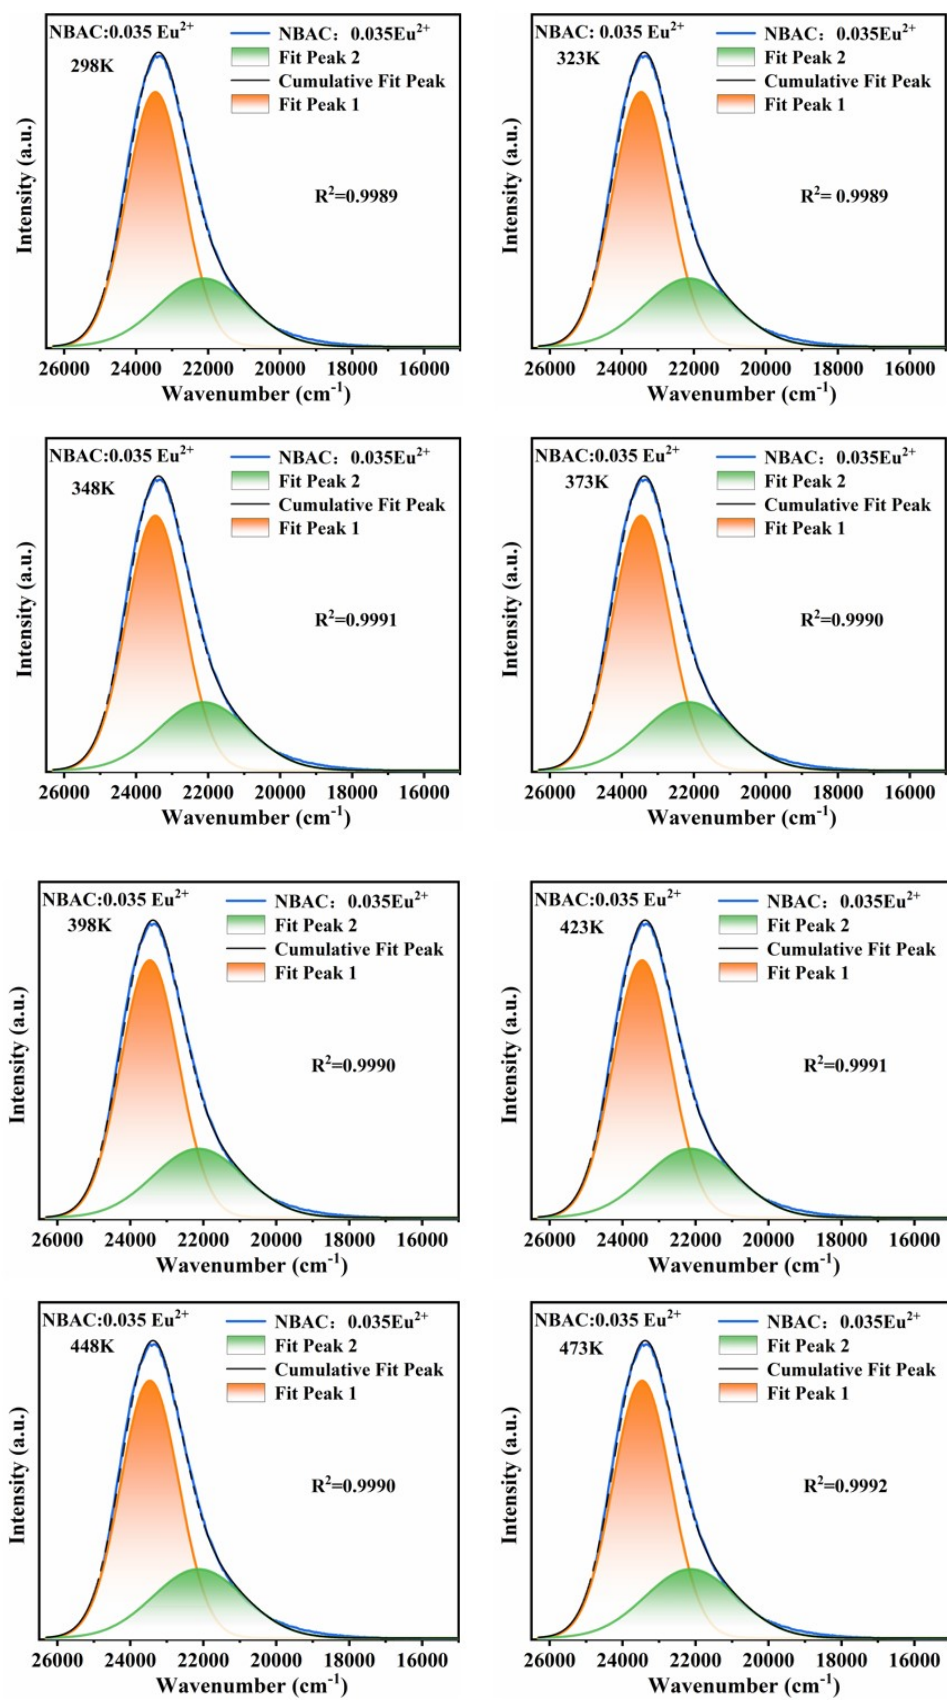

Fig. S4 Gaussian fitting for temperature-dependent emission spectra of NBAC:0.035Eu<sup>2+</sup>

Table S1 Crystallographic data for NBAC: 0.035Eu<sup>2+</sup> based on Rietveld refinement

| Formula                  | NaBa <sub>4</sub> AlB <sub>8</sub> O <sub>18</sub> Cl <sub>3</sub> :0.035Eu <sup>2+</sup> |
|--------------------------|-------------------------------------------------------------------------------------------|
| Space group              | P4 <sub>2</sub> nm                                                                        |
| a(Å)                     | 12.0480 (16)                                                                              |
| b(Å)                     | 12.0480 (2)                                                                               |
| c(Å)                     | 6.8165 (11)                                                                               |
| Z                        | 2                                                                                         |
| V(Å <sup>3</sup> )       | 989.4 (3)                                                                                 |
| <i>R</i> <sub>wp</sub> % | 8.41%                                                                                     |
| <i>R</i> <sub>p</sub> %  | 6.39%                                                                                     |
| $\chi^2$                 | 4.881                                                                                     |

Table S2 Lists of the luminescent decay times ( $\tau_1$ ,  $\tau_2$ ), fitting constants ( $A_1$ ,  $A_2$ ), average decay times ( $\tau_{av}$ ) and R-Square ( $R^2$ ) during the fitting of the decay curves of NBAC: $x$ Eu<sup>2+</sup> samples

| Sample  | $\tau_1$ (ns) | $A_1$  | $\tau_2$ (ns) | $A_2$  | $R^2$  |
|---------|---------------|--------|---------------|--------|--------|
| X=0.02  | 290.8         | 0.2032 | 751.1         | 0.7251 | 0.9976 |
| X=0.025 | 245.6         | 0.1534 | 743.7         | 0.8179 | 0.9979 |
| X=0.03  | 228.3         | 0.1416 | 731.9         | 0.8309 | 0.9980 |
| X=0.035 | 438.7         | 0.3713 | 803.3         | 0.6217 | 0.9980 |
| X=0.04  | 267.6         | 0.1775 | 745.2         | 0.7843 | 0.9979 |

| Sample  | Decay Lifetime (ns) |
|---------|---------------------|
| X=0.02  | 709.3               |
| X=0.025 | 713.6               |
| X=0.03  | 706.4               |
| X=0.035 | 714.7               |
| X=0.04  | 706.1               |

Table S3 Lists of the luminescent decay times ( $\tau_1$ ,  $\tau_2$ ), fitting constants ( $A_1$ ,  $A_2$ ), average decay times ( $\tau_{av}$ ) and R-Square ( $R^2$ ) during the fitting of the decay curves of NBAC:0.035Eu<sup>2+</sup> samples different emission decay curves for emissions at 423 and 447 nm

| Sample                      | $\tau_1$ (ns) | $A_1$  | $\tau_2$ (ns) | $A_2$  | $R^2$  |
|-----------------------------|---------------|--------|---------------|--------|--------|
| $\lambda_{ex}=423\text{nm}$ | 167.6         | 0.934  | 649.13        | 1.5400 | 0.9984 |
| $\lambda_{ex}=447\text{nm}$ | 303.3         | 0.4017 | 673.8         | 1.4828 | 0.9976 |

| Sample                      | Decay Lifetime (ns) |
|-----------------------------|---------------------|
| $\lambda_{ex}=423\text{nm}$ | 583.9               |
| $\lambda_{ex}=447\text{nm}$ | 633.5               |



Table S4 The CIE chromaticity coordinates and the chromaticity shift of NBAC:0.035Eu<sup>2+</sup> at temperatures from 298K to 423K

| Temperature (K) | CIE(x,y)         | $\Delta E$            |
|-----------------|------------------|-----------------------|
| 298             | (0.1611, 0.0416) | -                     |
| 323             | (0.1610, 0.0423) | $2.11 \times 10^{-3}$ |
| 348             | (0.1609, 0.0433) | $5.03 \times 10^{-3}$ |
| 373             | (0.1608, 0.0441) | $7.28 \times 10^{-3}$ |
| 398             | (0.1607, 0.0448) | $9.38 \times 10^{-3}$ |
| 423             | (0.1607, 0.0455) | $1.13 \times 10^{-2}$ |
